# Supplementary material
Source: ML conference proceedings conference paper supplement (https://openreview.net/forum?id=zU2v47WF0Ku)
Supplement: supplementary_material [file attachment]

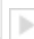

## Grade Report

Your grade report contains private information for internal use only, including + and - grade modifiers, dropped subjects, listener subjects, and non-passing freshman grades. It is for you, your advisor(s), and your departmental academic administrators. If you need to provide a copy of your grades to anyone else, you can [request a transcript](#) from the Student Services Center, 11-120.

### Fall Term 2017-2018

Year: 1 R

| Subject Number       | Subject Title              | Units            | Level | Grade            | Audit Info  |
|----------------------|----------------------------|------------------|-------|------------------|-------------|
| 6.0001               | Intro to CS Prog in Python | 6                | U     | P                | Half REST   |
| 6.006                | Introduction to Algorithms | 12               | U     | LIS              |             |
| 7.012                | Introductory Biology       | 12               | U     | P                | Biology     |
| 8.012                | Physics I                  | 12               | U     | P                | Physics I   |
| 18.01A               | Calculus                   | 12               | U     | P                | Calculus I  |
| 18.02A               | Calculus                   | 12               | U     | T                | Calculus II |
| 18.701               | Algebra I                  | 12               | U     | P                |             |
| <b>Units Earned:</b> | 54                         | <b>Term GPA:</b> |       | <b>Academic:</b> |             |

### January Term 2017-2018

Year: 1 R

| Subject Number       | Subject Title                  | Units            | Level | Grade            | Audit Info  |
|----------------------|--------------------------------|------------------|-------|------------------|-------------|
| 6.147                | Battlecode Program Competition | 6                | U     | P                |             |
| 18.02A               | Calculus                       | 12               | U     | P                | Calculus II |
| <b>Units Earned:</b> | 18                             | <b>Term GPA:</b> |       | <b>Academic:</b> |             |

### Spring Term 2017-2018

Year: 1 R

| Subject Number       | Subject Title                 | Units            | Level | Grade            | Audit Info             |
|----------------------|-------------------------------|------------------|-------|------------------|------------------------|
| 6.006                | Introduction to Algorithms    | 12               | U     | A                |                        |
| 6.036                | Intro to Machine Learning     | 12               | U     | A-               |                        |
| 6.041B               | Intro to Probability II       | 6                | U     | LIS              | Half REST              |
| 18.200               | Principles Discrete Appl Math | 15               | U     | A                | CI-M                   |
| 18.615               | Intro to Stochastic Process   | 12               | U     | LIS              |                        |
| SP.800               | Fresh/Alum Summer Internship  | 3                | U     | LIS              |                        |
| STS.008              | Technology and Experience     | 12               | U     | A-               | CI-H / HASS-E / HASS-S |
| <b>Units Earned:</b> | 51                            | <b>Term GPA:</b> | 5.0   | <b>Academic:</b> |                        |

### Fall Term 2018-2019

Year: 2 R Course(s): 18 C SB

| Subject Number | Subject Title | Units | Level | Grade | Audit Info |
|----------------|---------------|-------|-------|-------|------------|
|----------------|---------------|-------|-------|-------|------------|

|                      |                              |                  |     |                  |                 |
|----------------------|------------------------------|------------------|-----|------------------|-----------------|
| 2.EPW                | UPOP Engr Practice Wrkshp    | 1                | U   | P                |                 |
| 6.008                | Introduction to Inference    | 12               | U   | A                | Institute Lab   |
| 6.009                | Fundamentals of Programming  | 12               | U   | LIS              | Institute Lab   |
| 6.436                | Fundamentals of Probability  | 12               | U   | A-               |                 |
| 14.01                | Principles of Microeconomics | 12               | U   | B                | HASS-E / HASS-S |
| 18.211               | Combinatorial Analysis       | 12               | U   | A-               |                 |
| <b>Units Earned:</b> | 49                           | <b>Term GPA:</b> | 4.8 | <b>Academic:</b> |                 |

**January Term 2018-2019**

Year: 2 R Course(s): 18 C SB

| Subject Number       | Subject Title              | Units            | Level | Grade            | Audit Info |
|----------------------|----------------------------|------------------|-------|------------------|------------|
| 6.S087               | Special Subject in EE & CS | 6                | U     | P                |            |
| <b>Units Earned:</b> | 6                          | <b>Term GPA:</b> |       | <b>Academic:</b> |            |

**Spring Term 2018-2019**

Year: 2 R Course(s): (18, 6 3) SB

| Subject Number       | Subject Title                 | Units            | Level | Grade            | Audit Info      |
|----------------------|-------------------------------|------------------|-------|------------------|-----------------|
| 6.004                | Computation Structures        | 12               | U     | A                | REST Elect      |
| 6.009                | Fundamentals of Programming   | 12               | U     | A                | Institute Lab   |
| 6.853                | Topics in Algor Game Theory   | 12               | U     | LIS              |                 |
| 18.218               | Topics in Combinatorics       | 12               | U     | LIS              |                 |
| 18.303               | Linear PDE: Analysis Numerics | 12               | U     | A                | REST Elect      |
| 18.655               | Mathematical Statistics       | 12               | U     | A                |                 |
| 21M.600              | Introduction to Acting        | 9                | U     | A                | HASS-A / HASS-E |
| <b>Units Earned:</b> | 57                            | <b>Term GPA:</b> | 5.0   | <b>Academic:</b> |                 |

**Fall Term 2019-2020**

Year: 3 R Course(s): (18, 6 3) SB

| Subject Number       | Subject Title                  | Units            | Level | Grade            | Audit Info      |
|----------------------|--------------------------------|------------------|-------|------------------|-----------------|
| 6.031                | Elements of Software Construct | 15               | U     | A                |                 |
| 6.046                | Design and Analysis Algorithms | 12               | U     | A                |                 |
| 6.867                | Machine Learning               | 12               | U     | A                |                 |
| 6.920                | Practical Internshp Experience | 1                | U     | DR               |                 |
| 6.S979               | Special Subj: EECS             | 12               | U     | A                |                 |
| 8.05                 | Quantum Physics II             | 12               | U     | LIS              |                 |
| 21G.237              | Public Speaking for Bilingual  | 12               | U     | A                | HASS-E / HASS-H |
| <b>Units Earned:</b> | 63                             | <b>Term GPA:</b> | 5.0   | <b>Academic:</b> |                 |

**January Term 2019-2020**

Year: 3 R Course(s): (18, 6 3) SB

| Subject Number       | Subject Title          | Units            | Level | Grade            | Audit Info |
|----------------------|------------------------|------------------|-------|------------------|------------|
| 8.223                | Classical Mechanics II | 6                | U     | LIS              |            |
| 18.031               | Laplace Transform      | 3                | U     | LIS              |            |
| <b>Units Earned:</b> | 0                      | <b>Term GPA:</b> |       | <b>Academic:</b> |            |

**Spring Term 2019-2020**

Year: 3 R Course(s): (18, 6 3) SB

| Subject Number       | Subject Title                  | Units            | Level | Grade            | Audit Info      |
|----------------------|--------------------------------|------------------|-------|------------------|-----------------|
| 6.033                | Computer Systems Engineering   | 12               | U     | PE               | CI-M            |
| 6.265                | Discrete Prob & Stoch Process  | 12               | U     | PE               |                 |
| 6.881                | Adv Topics in Artificial Intel | 12               | U     | PE               |                 |
| 18.102               | Intro to Functional Analysis   | 12               | U     | PE               |                 |
| 24.116               | Philosophy of Statistics       | 12               | U     | PE               | HASS-E / HASS-H |
| <b>Units Earned:</b> | 60                             | <b>Term GPA:</b> |       | <b>Academic:</b> |                 |

**Summer Term 2020**

Year: 4 R Course(s): (18, 6 3) SB

| Subject Number       | Subject Title          | Units            | Level | Grade            | Audit Info               |
|----------------------|------------------------|------------------|-------|------------------|--------------------------|
| 6.URN                | Undergraduate Research | 1                | U     | URN              | Paid UROP / UROP subject |
| <b>Units Earned:</b> | 0                      | <b>Term GPA:</b> |       | <b>Academic:</b> |                          |

**Fall Term 2020-2021**

Year: 4 R Course(s): (18, 6 3) SB

| Subject Number       | Subject Title                  | Units            | Level | Grade            | Audit Info             |
|----------------------|--------------------------------|------------------|-------|------------------|------------------------|
| 3.091                | Intro to Solid-State Chemistry | 12               | U     | DR               | Chemistry              |
| 6.438                | Algorithms for Inference       | 12               | U     | LIS              |                        |
| 6.854                | Advanced Algorithms            | 12               | U     | A-               |                        |
| 6.883                | Adv Topics in Artificial Intel | 12               | U     | LIS              |                        |
| 6.UAR                | Seminar in Undergrad Research  | 6                | U     | J                | CI-M                   |
| 11.002               | Making Public Policy           | 12               | U     | A-               | CI-H / HASS-E / HASS-S |
| 18.226               | Prob Methods in Combinatorics  | 12               | U     | LIS              |                        |
| 18.435               | Quantum Computation            | 12               | U     | LIS              |                        |
| 18.704               | Seminar in Algebra             | 12               | U     | PE               | CI-M                   |
| <b>Units Earned:</b> | 42                             | <b>Term GPA:</b> | 5.0   | <b>Academic:</b> |                        |

**January Term 2020-2021**

Year: 4 R Course(s): (18, 6 3) SB

| Subject Number       | Subject Title              | Units            | Level | Grade            | Audit Info      |
|----------------------|----------------------------|------------------|-------|------------------|-----------------|
| 17.567               | Israel: Culture & Identity | 9                | U     | A-               | HASS-E / HASS-S |
| <b>Units Earned:</b> | 9                          | <b>Term GPA:</b> | 5.0   | <b>Academic:</b> |                 |

**Cumulative Undergraduate GPA:** 5.0 **Minor:**

**Degree Audit**

**Undergrad Audit in Course 18 -- Institute Requirements not complete: Chem, Phys II, 1 HASS subj, ConcSub: 17.811**  
**Complete: 14.0 GIR subjects (17 req'd) plus 241 units beyond GIRs (180 req'd)**

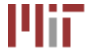

Massachusetts Institute of Technology  
77 Massachusetts Avenue  
Cambridge, MA 02139-4307

Room 5-117  
Hours: Mon-Fri, 9 am-5 pm  
[registrar-www@mit.edu](mailto:registrar-www@mit.edu)

[Office of the Dean for  
Undergraduate Education](#)
