# Supplementary material
Source: ML conference proceedings conference paper supplement (https://openreview.net/forum?id=zU2v47WF0Ku)
Supplement: supplementary_material [file attachment]

$g_1$   
 $g_2$   
 $\vdots$   
 $g_{|G|}$

$\left[ \begin{array}{c} \\ \\ \\ \end{array} \right]$

$g$

$\star$

$h_1$   
 $h_2$   
 $\vdots$   
 $h_{|G|}$

$\left[ \begin{array}{c} \\ \\ \\ \end{array} \right]$

$h$

$\xrightarrow{\mathcal{F}_M}$

$\hat{g}(\rho_1)$

$\hat{g}(\rho_2)$

$\hat{g}(\rho_3)$

$\cdot$

$\hat{h}(\rho_1)$

$\hat{h}(\rho_2)$

$\hat{h}(\rho_3)$

$\dagger$
